# Supplementary material for: Heterojunctions generated in SnO2–CuO nanocatalysts for improved catalytic property in the Rochow reaction
Source: Royal Society of Chemistry journal article supplement (doi:10.1039/c5ra10996e), 2015-01-01
Supplement: c5ra10996e1.pdf [file c5ra10996e1.pdf]

## Supporting Information

### Heterojunctions Generated in SnO<sub>2</sub>-CuO Nanocatalysts for Improved Catalytic Property in Rochow Reaction

Shanying Zou,<sup>a,b</sup> Yongjun Ji,<sup>b,\*</sup> Guangna Wang,<sup>b</sup> Yongxia Zhu,<sup>b</sup>

Hezhi Liu,<sup>b</sup> Lihua Jia,<sup>a</sup> Xiangfeng Guo,<sup>a,\*</sup> Ziyi Zhong,<sup>c</sup> and Fabing Su<sup>b,\*</sup>

<sup>a</sup> *College of Chemistry and Chemical Engineering, Qiqihaer University, Qiqihaer 161006, Heilongjiang Province, China.*

<sup>b</sup> *State Key Laboratory of Multiphase Complex Systems, Institute of Process Engineering, Chinese Academy of Sciences, Beijing 100190, China.*

<sup>c</sup> *School of Chemical & Biomedical Engineering, Nanyang Technological University, 62 Nanyang Drive, Singapore 637459.*

\*To whom correspondence should be addressed. E-mail address: yjji@ipe.ac.cn (Y. Ji), xfguo@163.com (X. Guo), fbsu@ipe.ac.cn (F. Su), Tel.: +86-10-82544850, Fax: +86-10-82544851.

**Table S1** Comparison of catalytic performances over various Cu-based catalysts in Rochow reaction.

| Sample                                          | Catalyst: Si<br>(weight ratio) | Temperature<br>(°C) | Time<br>(h) | M2<br>selectivity<br>(%) | M2<br>yield<br>(%) | Ref.       |
|-------------------------------------------------|--------------------------------|---------------------|-------------|--------------------------|--------------------|------------|
| Cu <sub>2</sub> O microspheres                  | 10%                            | 345                 | 24          | 66.4                     | 27.1               | [10]       |
| Cu                                              | 5%                             | 300                 | 24          | 90.0                     | 9.0                | [11]       |
| Cu microparticles                               | 10%                            | 325                 | 24          | 68.3                     | 22.4               | [15]       |
| Flower-like CuO<br>microspheres                 | 10%                            | 325                 | 24          | 84.2                     | 23.1               | [16]       |
| dandelion-like CuO<br>microspheres              | 10%                            | 325                 | 24          | 86.7                     | 36.1               | [17]       |
| Cu@Cu <sub>2</sub> O core-shell<br>microspheres | 10%                            | 325                 | 24          | 83.3                     | 23.8               | [18]       |
| f-ZnO@u-CuO                                     | 5%                             | 325                 | 24          | 69.6                     | 13.9               | [22]       |
| 1 wt.% SnO <sub>2</sub> -CuO                    | 5%                             | 295                 | 24          | 78.9                     | 44.2               | This study |
| 1 wt.% SnO <sub>2</sub> -CuO                    | 5%                             | 325                 | 24          | 90.1                     | 45.5               | This study |

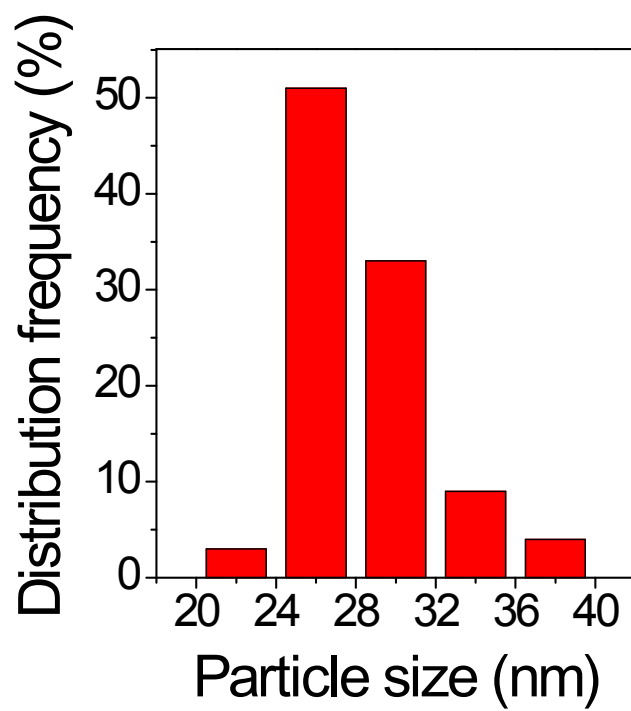

Fig. S1 The size distribution histogram of SnO<sub>2</sub> NPs.

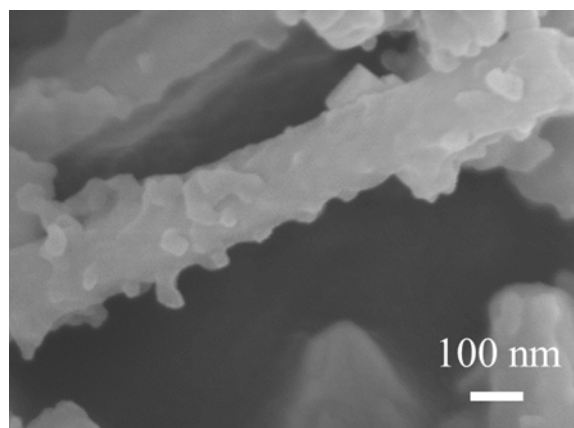

Fig. S2 SEM image of 5.0 wt.% SnO<sub>2</sub>-CuO.

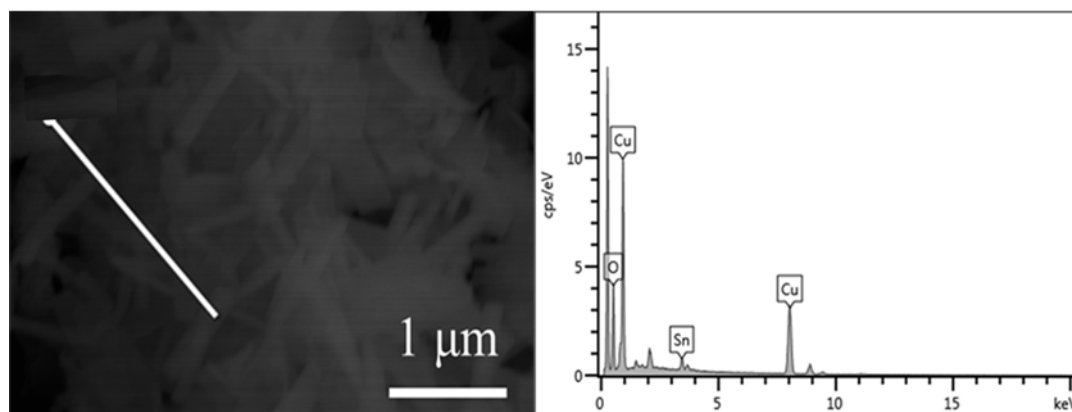

Fig. S3 EDS line-scanning spectrum of 5.0 wt.% SnO<sub>2</sub>-CuO.

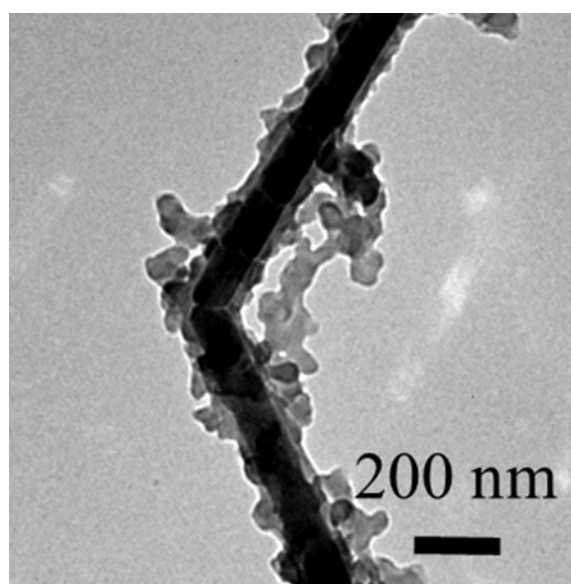

Fig. S4 TEM image of 5.0 wt.% SnO<sub>2</sub>-CuO.

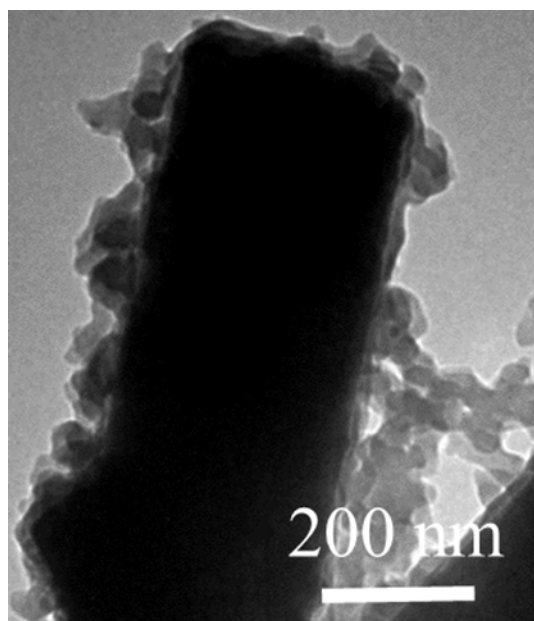

Fig. S5 TEM image of 10.0 wt.% SnO<sub>2</sub>-CuO.

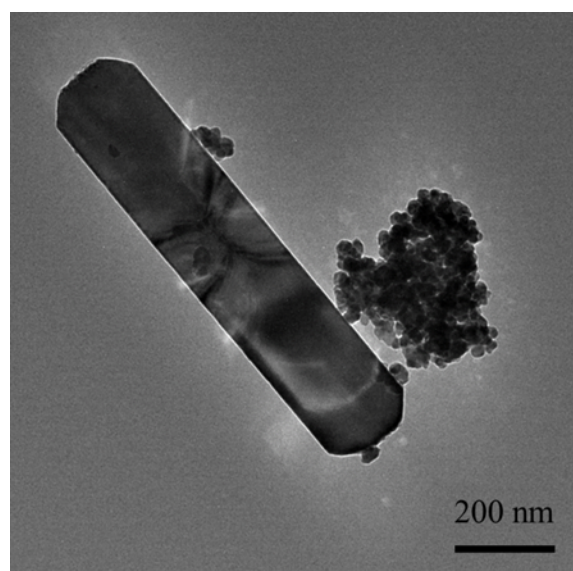

Fig. S6 TEM image of unattached SnO<sub>2</sub> and CuO in the absence of PVP.
